# Supplementary material for: LCA and C-LCC Indicator as Tools for Sodium-Ion Batteries’ Eco-Design
Source: MDPI journal article supplement (doi:10.3390/en16176220), 2023-08-27
Supplement: s1 [file s1]

## Supplementary materials

# LCA and C-LCC indicator as tools for Sodium-ion batteries eco-design

Maria Leonor Carvalho, Maria Anna Cusenza, Giulio Mela, Andrea Temporelli and Pierpaolo Girardi

Ricerca Sistema Energetico–RSE SpA, Via R. Rubattino 54, 20134 Milan, Italy

Correspondence: marialeonor.carvalho@rse-web.it

**Summary:** This supporting information contains a full inventory of the different batteries' components and results.

Cathode

Cathode Inventory

**Table S1** - Inventory data for the cathodic active material production process, at the laboratory scale, considering two different synthesis processes: Sol-Gel (SG) and Solid-State (SS). For sol-gel synthesis, two scenarios were considered: From nitrates (SG\_N) and from acetates (SG\_A).

| Production process                                                                                                                  | SG_N     | SG_A     | SS      |
|-------------------------------------------------------------------------------------------------------------------------------------|----------|----------|---------|
|                                                                                                                                     | Amount   | Amount   | Amount  |
| Input                                                                                                                               |          |          |         |
| Materials                                                                                                                           |          |          |         |
| Sodium nitrate $\text{NaNO}_3$ [g]                                                                                                  | 1.2086   | -        | -       |
| Manganese nitrate $\text{Mn}(\text{NO}_3)_2 \cdot 4\text{H}_2\text{O}$ [g]                                                          | 4.9165   | -        | -       |
| Sodium acetate $\text{C}_2\text{H}_3\text{NaO}_2$ [g]<br>(Carlo Erba, CAS 127-09-3)                                                 | -        | 1.1665   | -       |
| Manganese acetate tetrahydrate $(\text{CH}_3\text{COO})_2\text{Mn} \cdot 4\text{H}_2\text{O}$ [g]<br>(Acros Organic, CAS 6156-78-1) | -        | 4.8005   | -       |
| Citric acid $\text{C}_6\text{H}_8\text{O}_7$ [g]<br>(Carlo Erba, CAS 5949-29-1)                                                     | 12.8999  | 6.2466   | -       |
| Deionized water [ml]                                                                                                                | 100      | 100      | 5       |
| Manganese carbonate $\text{MnCO}_3$ [g]<br>(Sigma-Aldrich, CAS 598-62-9)                                                            | -        |          | 2.25149 |
| Sodium carbonate $\text{Na}_2\text{CO}_3$ [g]<br>(Sigma-Aldrich, CAS 497-19-8)                                                      | -        |          | 0.68508 |
| Energy/Heat                                                                                                                         |          |          |         |
| Stirring and heat at 80°C [kWh]                                                                                                     | 0.1300   | 0.1300   | -       |
| Heat treatment [kWh]                                                                                                                | 12       | 12       | 10.56   |
| Milling [kWh]                                                                                                                       | -        | -        | 0.25    |
| Output                                                                                                                              |          |          |         |
| $\text{Na}_{0.66}\text{MnO}_2$ [g]                                                                                                  | 2        | 2        | 2       |
| Emissions                                                                                                                           |          |          |         |
| $\text{CO}_2$ [g]                                                                                                                   | -        | 2.5749   | 0.93657 |
| $\text{H}_2\text{O}$ [ml]                                                                                                           | 101.4258 | 101.3921 | 5       |
| $\text{NO}_2$ [g]                                                                                                                   | 2.6992   | -        | -       |
| $\text{C}_6\text{H}_8\text{O}_7$ [g]                                                                                                | 12.9899  | 6.2466   | -       |

Table S2 shows the inventory data sources for modelling background processes. The processes have been modelled through specific datasets available on Ecoinvent 3.8 or, when not available in Database, literature data have been used.

**Table S2** - Background processes modelling for the cathodic active material  $\text{Na}_{0.66}\text{MnO}_2$  production.

| Procut flow                                                                                  | Data source                     | Dataset/ Reference                                                                              |
|----------------------------------------------------------------------------------------------|---------------------------------|-------------------------------------------------------------------------------------------------|
| Manganese carbonate $\text{MnCO}_3$                                                          | Literature                      | Dai [1]                                                                                         |
| Sodium carbonate $\text{Na}_2\text{CO}_3$                                                    | <i>Ecoinvent</i><br>3.8 dataset | Soda ash, dense {GLO}   market for   Cut-off, U                                                 |
| Sodium acetate $\text{C}_2\text{H}_3\text{NaO}_2$                                            | Literature                      | Jungbluth [2]                                                                                   |
| Manganese acetate tetrahydrate $(\text{H}_3\text{CCOO})_2\text{Mn}\cdot 4\text{H}_2\text{O}$ | Literature                      | Dai [1]                                                                                         |
| Energy                                                                                       | Literature                      | Carvalho [3]                                                                                    |
| Citric acid $\text{C}_6\text{H}_8\text{O}_7$                                                 | <i>Ecoinvent</i><br>3.8 dataset | Citric acid {GLO}   market for   Cut-off, U                                                     |
| Manganese nitrate $\text{Mn}(\text{NO}_3)_2\cdot 4\text{H}_2\text{O}$                        | Literature                      | Johansson and Norrman [4]                                                                       |
| Sodium nitrate $\text{NaNO}_3$                                                               | <i>Ecoinvent</i><br>3.8 dataset | Sodium nitrate, technical grade {GLO}   market for sodium nitrate, technical grade   Cut-off, U |
| Deionized water                                                                              | <i>Ecoinvent</i><br>3.8 dataset | Water, deionized {Europe without Switzerland}   market for water, deionized   Cut-off, U        |

**Table S3** – Average work potentials and capacities (SG\_N: Sol-gel synthesis from nitrates; SG\_A: Sol-gel synthesis from acetates; SS: Solid state synthesis).

|       | Potential (V) | Capacity (mAh/g) | Potential (V) | Theoretic capacity (mAh/g) |
|-------|---------------|------------------|---------------|----------------------------|
| SG_N  | 3.08          | 160              | 4.4           | 175                        |
| SG_A* | 3.08          | 160              |               |                            |
| SS    | 2.96          | 137.5            |               |                            |

\* The same as SG\_N

Cathode results

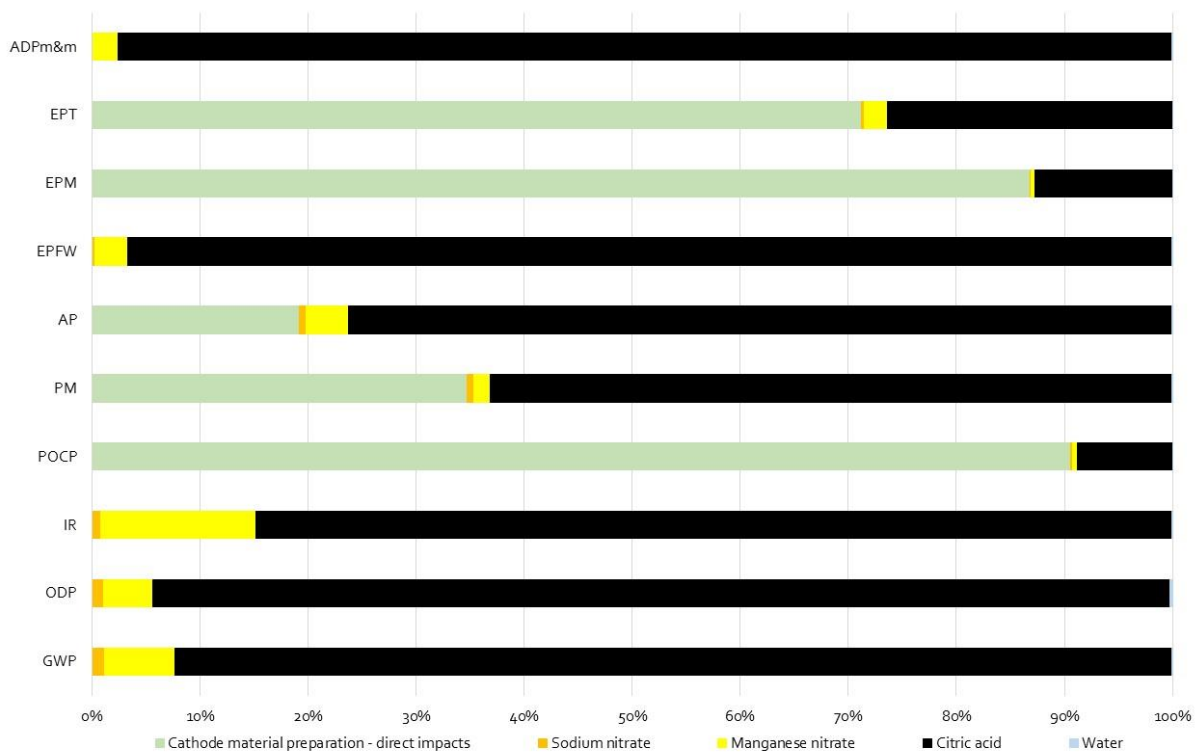

(a)

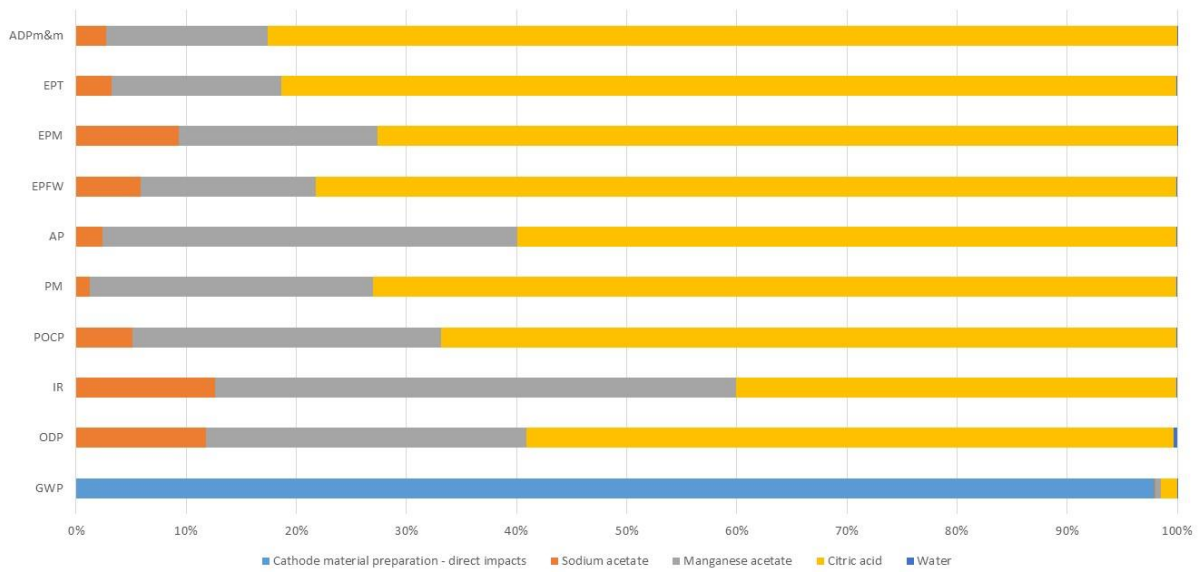

(b)

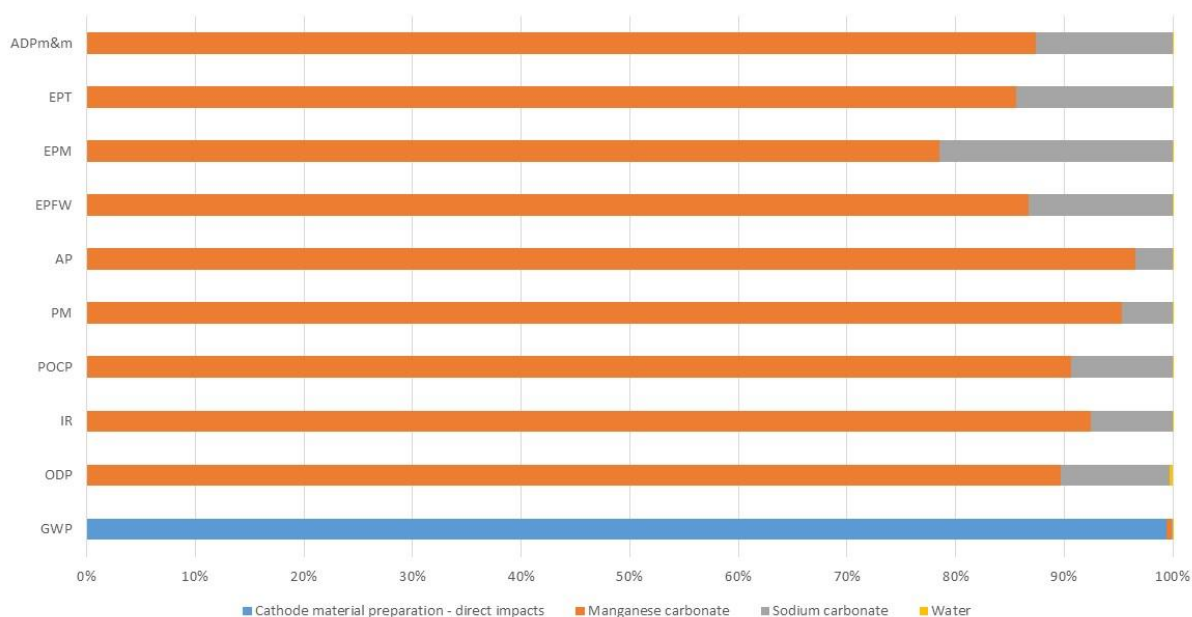

(c)

**Figure S1.** Impact assessment results for 1 Wh of cathodic active material capacity, broken down different components/phases of the production proces, excluding energy consumption: (a) SG\_N: sol-gel synthesis, nitrate precursors; (b) SG\_A: sol-gel synthesis, acetate precursors and (c) SS: solid state synthesis (GWP: Global warming Potential, ODP: Ozone depletion potential, IR: Ionizing radiation, POCP: Photochemical ozone formation, PM: Particulate matter, AP: Acidification, EPFW: Eutrophication freshwater, EPM: Eutrophication marine, EPT: Eutrophication terrestrial, ADPm&m: Resource use, minerals and metals).

## Anode

### Anode Inventory

**Table S1** – Inventory data for anode materials production process, at laboratory scale.

| Production process                                             | Sn-NC_PVDF    | Sn-NC_CMC     | Sn            |
|----------------------------------------------------------------|---------------|---------------|---------------|
| <b>Anodic active material production</b>                       | <b>Amount</b> | <b>Amount</b> | <b>Amount</b> |
| Input                                                          |               |               |               |
| Materials                                                      |               |               |               |
| Sn powder [g]<br>(Atlantic equipment engineers, CAS 7440-31-5) | 0.67          | 0.58          | 0.7           |
| Carbon nanofibers [g]<br>(Sigma-Aldrich, CAS 308063-67-4)      | 0.13          | 0.12          |               |
| Energy/Heat                                                    |               |               |               |
| Milling [kWh]                                                  | 0.40          | 0.35          | 0.42          |
| Output                                                         |               |               |               |
| Sn and Carbon nanofibers                                       | 0.8           | 0.7           | 0.7           |
|                                                                |               |               |               |
| <b>Anodic material production</b>                              | <b>Amount</b> | <b>Amount</b> | <b>Amount</b> |
| Input                                                          |               |               |               |
| Materials                                                      |               |               |               |
| Anodic active material [g]                                     | 0.8           | 0.7           | 0.7           |
| Binder_ PVDF [g]<br>(Solef, Solvay)                            | 0.1           |               | 0.1           |

|                                                             |      |      |      |
|-------------------------------------------------------------|------|------|------|
| Binder_ CMC [g]<br>(Sigma-Aldrich, CAS 9004-32-4)           |      | 0.15 |      |
| Additive_ Black carbon (C65) [g]<br>(Imerys, CAS 1333-86-4) | 0.1  | 0.15 | 0.2  |
| Solvent_ acetone[g]                                         | 5.91 |      |      |
| Solvent_ demi water [g]                                     |      | 8.33 |      |
| Solvent_ NMP[g]                                             |      |      | 6.85 |
| Energy/Heat                                                 |      |      |      |
| Energy drying [kWh]                                         | 4.08 | 4.08 | 3.27 |
| Energy calendering [kWh]                                    | 1    | 1    | 1    |
| Output                                                      |      |      |      |
| Materials                                                   |      |      |      |
| Anodic material [g]                                         | 1    | 1    | 1    |
| Emissions                                                   |      |      |      |
| Acetone [g]                                                 | 5.91 |      |      |
| Demi water [g]                                              |      | 8.33 |      |
| NMP [g]                                                     |      |      | 6.85 |

**Table S2** – Average work potentials and capacities.

| Anodic material | Potential (V) | Capacity (mAh/g) | Sn theoretical capacity (mAh/g) |
|-----------------|---------------|------------------|---------------------------------|
| Sn-NC_PVDF      | 0.64          | 85.5             | 847                             |
| Sn-NC_CMC       | 0.56          | 89               |                                 |
| Sn              | 0.58          | 222              |                                 |

Table S6 shows the inventory data sources for modeling background processes. The processes have been modeled through specific datasets available on Ecoinvent 3.8 or, when not available in Database, literature data have been used.

**Table S3** – Background processes modelling for the anodic materials.

| Product flow                       | Data source                  | Dataset/ Reference                                                                          |
|------------------------------------|------------------------------|---------------------------------------------------------------------------------------------|
| Sn powder                          | <i>Ecoinvent 3.8 dataset</i> | Tin {GLO}, market for   Cut-off, U                                                          |
| Carbon nanofibers                  | Literature                   | Khanna et al. [5]                                                                           |
| Energy                             | Literature                   | Carvalho et al. [3]                                                                         |
| Binder_ PVDF                       | <i>Ecoinvent 3.8 dataset</i> | Polyvinylfluoride {GLO}  market for   Cut-off, U<br>(proxy for PVDF)                        |
| Binder_ CMC                        | <i>Ecoinvent 3.8 dataset</i> | Carboxymethyl cellulose, powder {GLO}  market<br>for   Cut-off, U                           |
| Additive – Carbon black<br>(C65)   | <i>Ecoinvent 3.8 dataset</i> | Carbon black {GLO}  market for   Cut-off, U RSE                                             |
| Solvent_ Acetone                   | <i>Ecoinvent 3.8 dataset</i> | Acetone, liquid {RER}  market for acetone, liquid<br>  Cut-off, U                           |
| Solvent_ Demi water                | <i>Ecoinvent 3.8 dataset</i> | Water, deionised {Europe without Switzerland}  <br>market for water, deionised   Cut-off, U |
| Solvent_ N-metil-2-<br>pyrrolidone | <i>Ecoinvent 3.8 dataset</i> | N-methyl-2-pyrrolidone {GLO}  market for  <br>Cut-off, U                                    |

## Anode Results

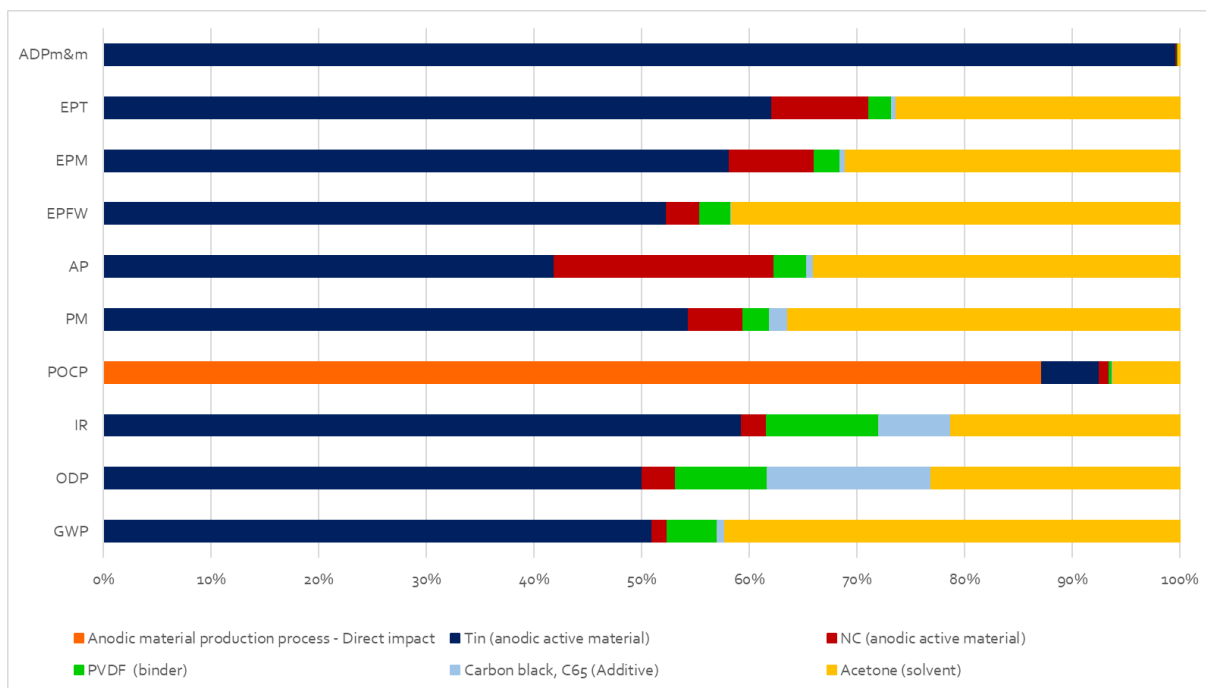

(a)

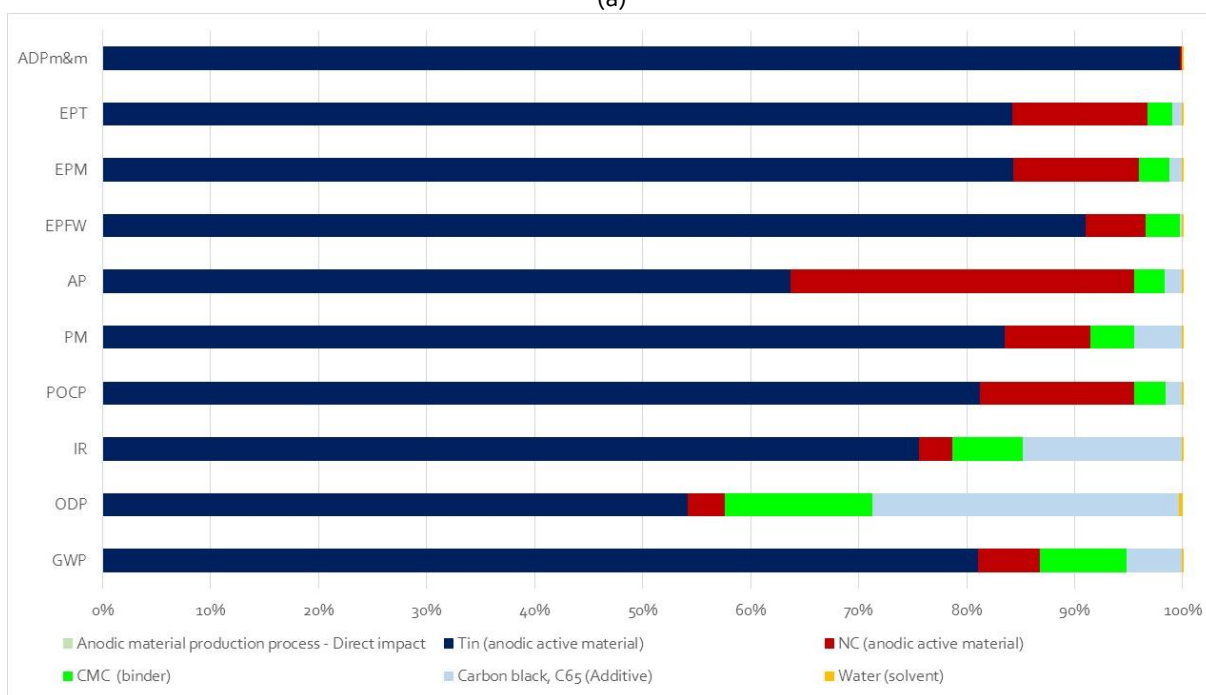

(b)

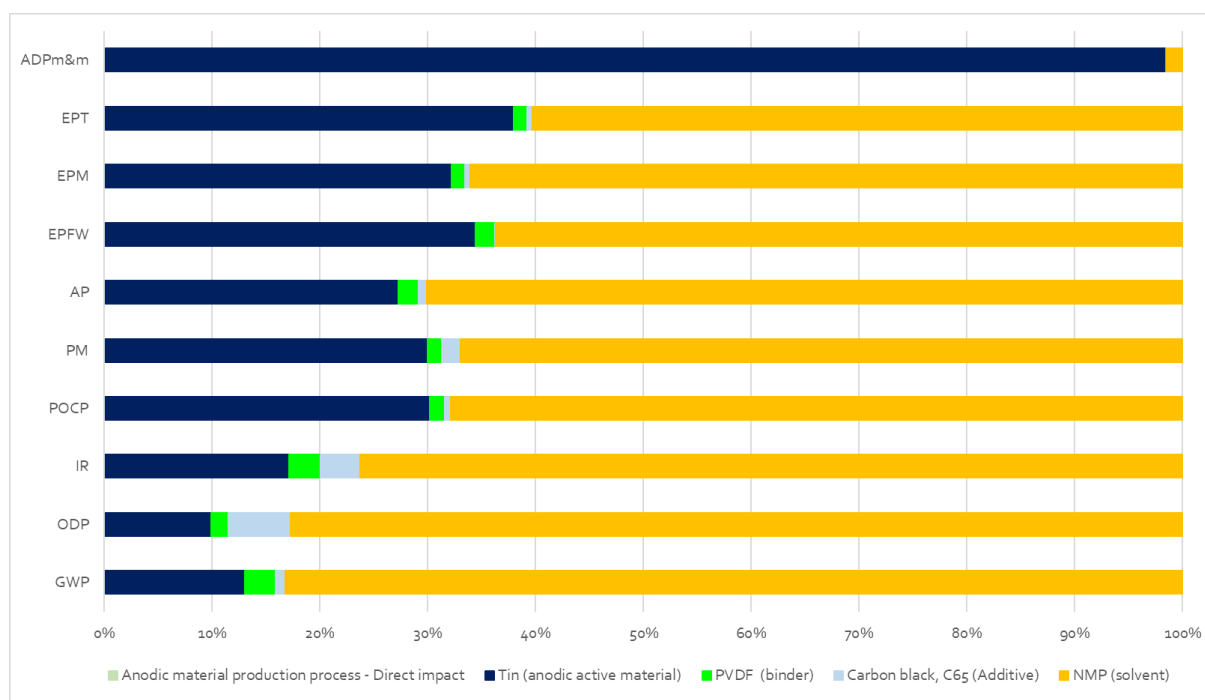

(c)

**Figure S2.** Impact assessment results for 1 Wh of anode material capacity, broken down different components/phases of the production process, excluding energy consumption: (a) Sn-NC\_PVDF ; (b) Sn-NC\_CMC and Sn (c) (GWP: Global warming Potential, ODP: Ozone depletion potential, IR: Ionizing radiation, POCP: Photochemical ozone formation, PM: Particulate matter, AP: Acidification, EPFW: Eutrophication freshwater, EPM: Eutrophication marine, EPT: Eutrophication terrestrial, ADPm&m: Resource use, minerals and metals).

### Uncertainty analysis: Monte Carlo

The C-LCC indicator is based on market prices: therefore, price fluctuations might have an impact on the indicator values. Market price volatility might be factored-in with an uncertainty assessment carried out with the Monte Carlo method.

Since the probability distribution of price series is unknown (and cannot be estimated with distribution fitting techniques due to the low number of observations), it is assumed that all price series follow a triangular distribution. The parameters used to describe the triangular distribution are the maximum and minimum values of each price series during a ten-year period and the mean (used to compute the baseline indicator) over the same period.

Starting from triangular distributions, for each series, 10,000 casual values have been generated, in turn used to compute the C-LCC indicator for 10,000 times. Given the high number of simulations, the empirical distribution function is used to calculate the probability that the C-LCC falls above or under the baseline value and the probability that – given price volatility – the C-LCC calculated for an anode (cathode) is higher or lower than calculated for the other alternatives.

The Monte Carlo analysis, therefore, is an effective tool to assess the robustness of the baseline values and the ordering of the alternatives based on the C-LCC indicator. Figure S3 and figure S4 illustrate the simulation results, while figures S5 and S6 show the probabilities that, given price fluctuations, the indicator falls below baseline values. Such likelihood is high in all cases, meaning that the baseline values are relatively “optimistic”.

Finally, the Monte Carlo analysis shows that, even taking price volatility into account, the ordering of the anodes and cathodic active materials considered do not change, highlighting the high robustness of the indicator in identifying the less natural resource-intensive alternatives.

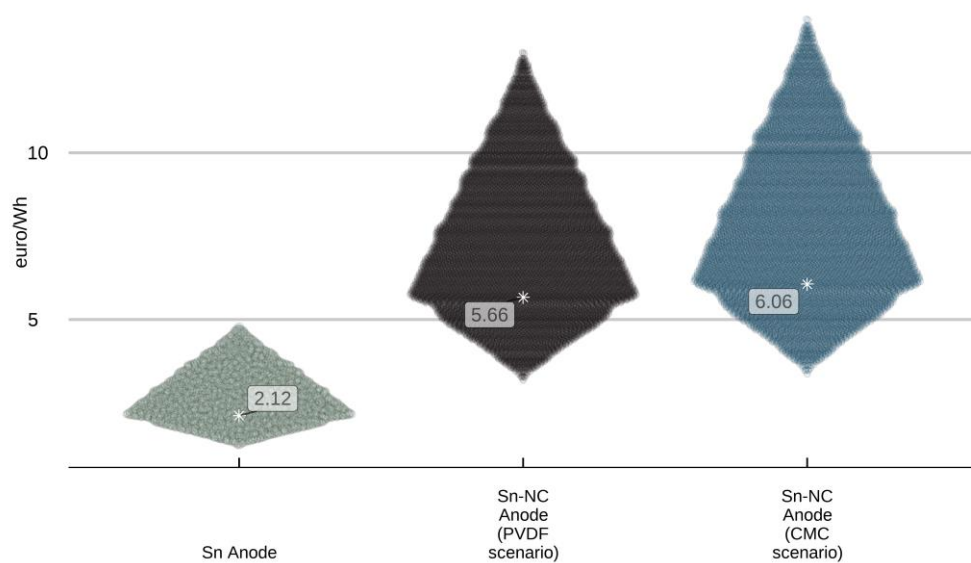

**Figure S3.** Anode: Monte Carlo simulations and comparison with baseline values.

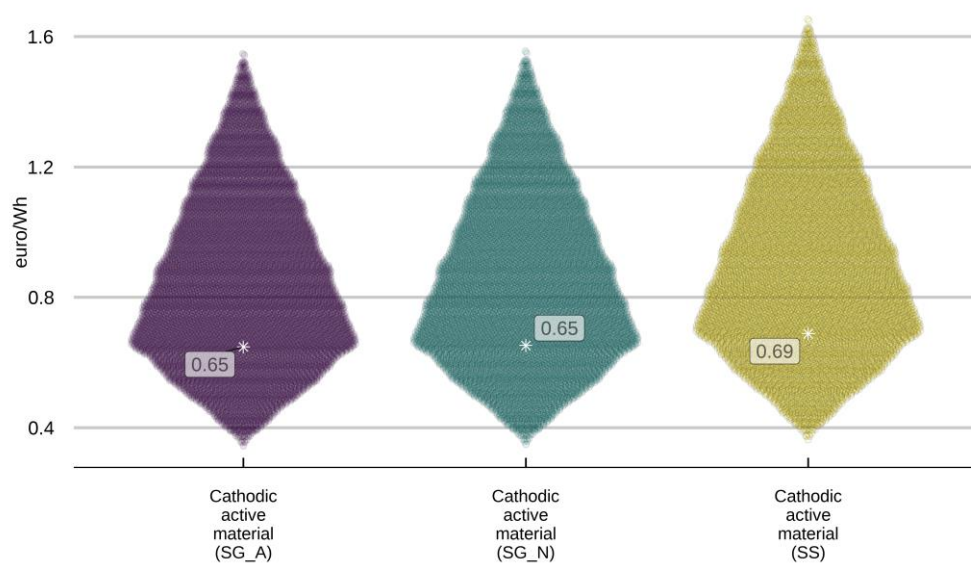

**Figure S4.** Cathodic material: Monte Carlo simulations and comparison with baseline values.



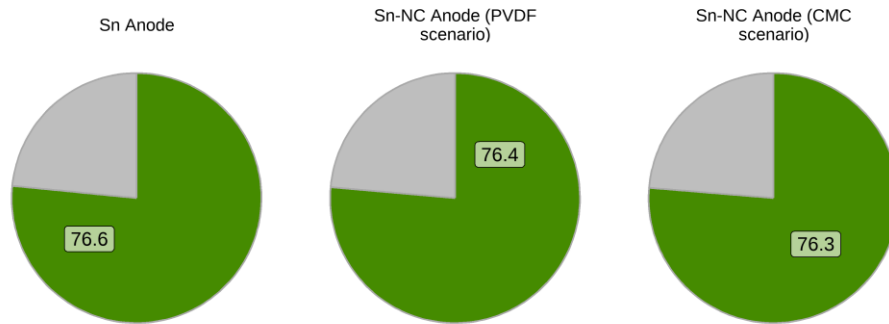

**Figure S5.** Anode: probabilities that the C-LCC indicator falls below the baseline value, given price fluctuations.

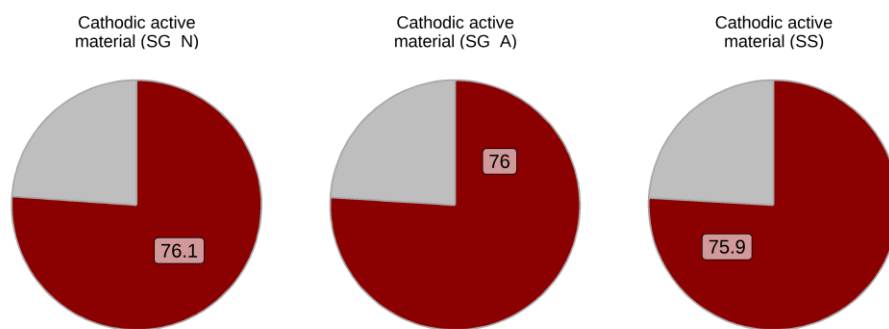

**Figure S6.** Cathod material: probabilities that the C-LCC indicator falls below the baseline value, given price fluctuations.

## References

- [1] Q. Dai, "Life Cycle Assessment of Natural Gas Utilization in Light-duty Passenger Vehicles," Civil and Environmental Engineering Ann Arbor, University of Michigan, MI (USA), 2014.
- [2] N. Jungbluth, "Life Cycle Inventory of Sodium Acetate and Expanded Graphite," ESU-servives Ltd., 2008.
- [3] M. L. Carvalho, B. Marmiroli, G. Mela and A. Molocchi, "LCA ed esternalità del kWh italiano: 2020 e scenari futuri," RSE SpA, Milano, 2022.
- [4] E. Johansson and F. Norrman, "Life cycle analysis on phase change materials for thermal energy storage," Royal institute of technology (KTH), Stockholm, 2019.
- [5] V. Khanna, B. Bakshi and L. Lee, "Carbon Nanofiber Production. Life Cycle Energy Consumption and Environmental Impact," *Journal of Industrial Ecology*, vol. 12, no. 3, pp. 394-410, 2008.
